# Supplementary material
Source: PubMed Central journal article supplement (PMC11028525)
Supplement: 262_2015_1695_MOESM1_ESM.pdf [file 262_2015_1695_MOESM1_ESM.pdf]

**Supplementary Table 1.** Comparison of B7.1 and 4-1BBL expression on B16-F10 wild-type cells with the levels expressed by the engineered vaccine cells.

| <b>Cell Line</b>                                            | <b>Fold increase in expression*</b> |
|-------------------------------------------------------------|-------------------------------------|
| B16-F10<br>MHC Class I                                      | 1                                   |
| B7.1                                                        | 1                                   |
| 4-1BBL                                                      | 3                                   |
| B16-F10-4-1BBL IFN $\gamma$ / $\beta$ :<br>MHC Class I      | 24                                  |
| 4-1BBL                                                      | 1104                                |
| B16-F10-B7.1 IFN $\gamma$ / $\beta$ :<br>MHC Class I        | 18                                  |
| B7.1                                                        | 24                                  |
| B16-F10-4-1BBL-B7.1 IFN $\gamma$ / $\beta$ :<br>MHC Class I | 24                                  |
| B7.1                                                        | 49                                  |
| 4-1BBL                                                      | 465                                 |

\* All fold increase values in co-stimulatory molecule expression are shown relative to the values produced by the isotype stained cells.

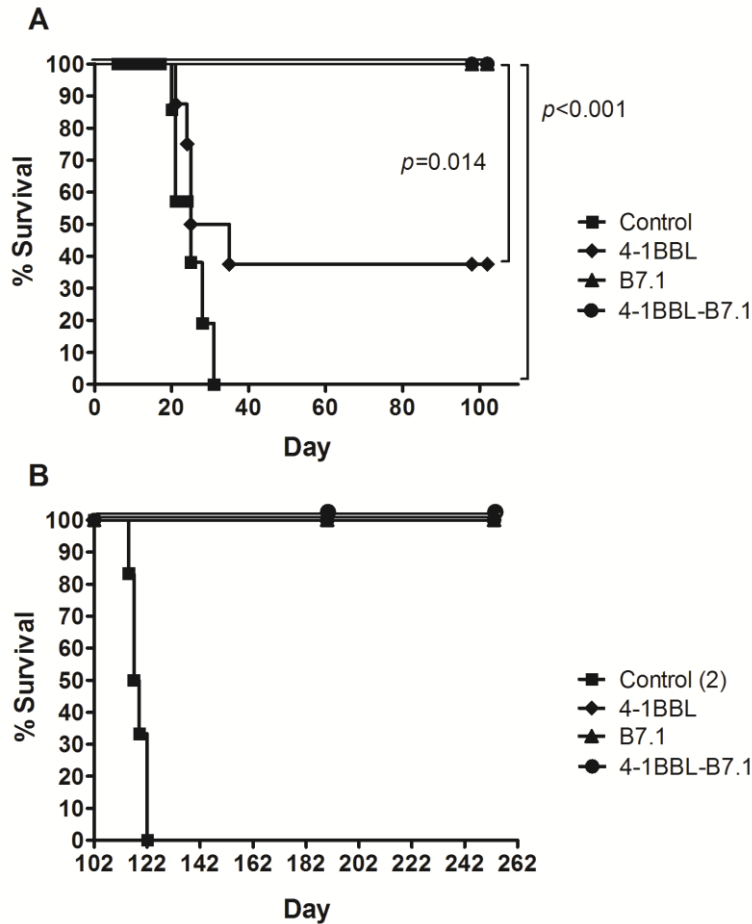

**Supplementary Fig. 1** Vaccinating C57BL/6 mice with either the B16-F10-B7.1-IFN $\gamma$ / $\beta$  or B16-F10-4-1BBL-B7.1-IFN $\gamma$ / $\beta$  cells completely protects against tumour development when challenged with  $5 \times 10^5$  live B16-F10-B7.1 cells. C57BL/6 mice remained unvaccinated as controls (n=6) or were treated with either B16-F10-4-1BBL-IFN $\gamma$ / $\beta$  (4-1BBL; n=6), B16-F10-B7.1-IFN $\gamma$ / $\beta$  (B7.1; n=7) or B16-F10-4-1BBL-B7.1-IFN $\gamma$ / $\beta$  cell vaccines (4-1BBL-B7.1; n=7). Mice were then challenged with  $5 \times 10^5$  live B16-F10-B7.1 cells and survival assessed **A**. Mice that survived initial tumour challenge were further boosted with an additional two doses of vaccine. The vaccinated mice and a separate group of naïve mice were challenged with  $5 \times 10^5$  live B16-F10-B7.1 cells and survival assessed **B**. Data for each panel are representative of two independent experiments and survival was analysed using the Log rank test.

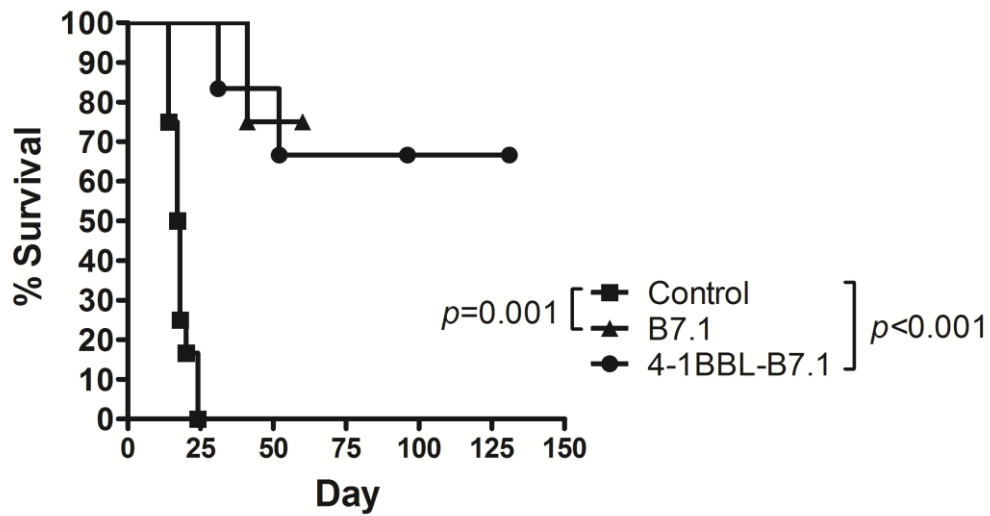

**Supplementary Fig. 2** Treating  $LT\alpha^{-/-}$  mice with either the B16-F10-B7.1- $IFN\gamma/\beta$  or B16-F10-4-1BBL-B7.1- $IFN\gamma/\beta$  anticancer vaccine enhances survival after challenge with  $5 \times 10^5$  live B16-F10-B7.1 cells.  $LT\alpha^{-/-}$  mice were used as controls (n=12) or injected with either B16-F10-B7.1- $IFN\gamma/\beta$  (B7.1; n=4) or B16-F10-4-1BBL-B7.1- $IFN\gamma/\beta$  (4-1BBL-B7.1; n=6) vaccines. Four days following the final vaccination, all mice were challenged with  $5 \times 10^5$  live B16-F10-B7.1 cells and survival assessed. Data are representative of two independent experiments and survival was analysed using the Log rank test.
